# Supplementary material
Source: PubMed Central journal article supplement (PMC3365962)
Supplement: supp_M112.363747_jbc.M112.363747-1.pdf [file supp_M112.363747_jbc.M112.363747-1.pdf]

Supplemental figure 1.

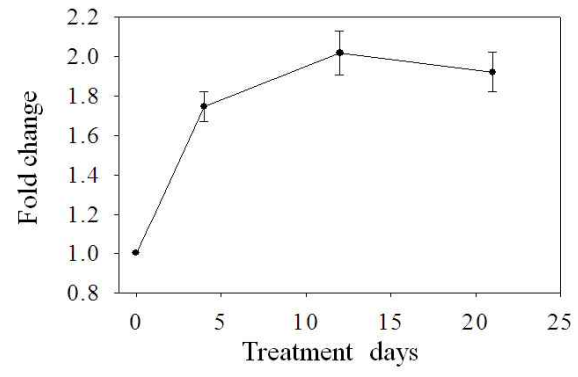

Supplemental figure 2.

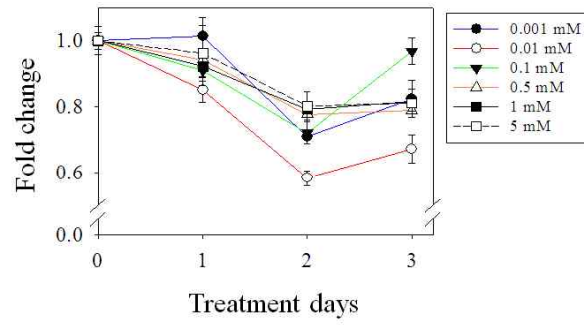

**Supplemental figure 1. Status of [NAD<sup>+</sup>] during the 21 days of NAM treatment.** Cells cultured in the medium supplemented with 5 mM NAM (replaced in every 3 days.) were collected at 4, 12, or 21 days and total [NAD<sup>+</sup>] was determined, and the values relative to the concentration in the mock-treated cells were plotted.

**Supplemental figure 2. Cellular response in mitochondrial content upon treatment of a wide range of NAD<sup>+</sup>.** Fibroblasts were treated with NAD<sup>+</sup> ranging from 1, 10, 100, 500  $\mu$ M, or 1 or 5 mM for 1, 2, or 3 days. The cells were stained with NAO and applied to flow cytometry.
